# Supplementary material for: Hospital Caseload Demand in the Presence of Interventions during the COVID-19 Pandemic: A Modeling Study
Source: J Clin Med. 2020 Sep 23;9(10):3065. doi: 10.3390/jcm9103065 (PMC7598167; doi:10.3390/jcm9103065)
Supplement: Supplementary file 1 [file jcm-09-03065-s001.xlsx]

## Sheet: Total
Anticipated peak caseload by prefecture		Working-age centerd model (based on Osaka data)																											Elderly centered model (based on Hokkaido data)
		Assumed R=1.4									Assumed R=1.7									Assumed R=2.0									Assumed R=1.4									Assumed R=1.7									Assumed R=2.0
		Delay in declaration = 1 day			Delay in declaration = 3 day			Delay in declaration = 7 day			Delay in declaration = 1 day			Delay in declaration = 3 day			Delay in declaration = 7 day			Delay in declaration = 1 day			Delay in declaration = 3 day			Delay in declaration = 7 day			Delay in declaration = 1 day			Delay in declaration = 3 day			Delay in declaration = 7 day			Delay in declaration = 1 day			Delay in declaration = 3 day			Delay in declaration = 7 day			Delay in declaration = 1 day
Prefecture	Population	Total caseload	Peak admissions	Peak ICU demand	Total caseload	Peak admissions	Peak ICU demand	Total caseload	Peak admissions	Peak ICU demand	Total caseload	Peak admissions	Peak ICU demand	Total caseload	Peak admissions	Peak ICU demand	Total caseload	Peak admissions	Peak ICU demand	Total caseload	Peak admissions	Peak ICU demand	Total caseload	Peak admissions	Peak ICU demand	Total caseload	Peak admissions	Peak ICU demand	Total caseload	Peak admissions	Peak ICU demand	Total caseload	Peak admissions	Peak ICU demand	Total caseload	Peak admissions	Peak ICU demand	Total caseload	Peak admissions	Peak ICU demand	Total caseload	Peak admissions	Peak ICU demand	Total caseload	Peak admissions	Peak ICU demand	Total caseload	Peak admissions	Peak ICU demand
Hokkaido	5304413	661	383	43.3761	770	449	50.9896	1050	623	71.049	1236	641	69.834	1571	822	89.8512	2541	1356	149.362	2334	1176	126.752	3204	1633	176.897	6044	3145	343.622	675	473	57.3752	798	566	68.7217	1113	806	98.438	1241	839	100.813	1592	1094	132.085	2636	1870	227.75	2261	1527	183.998
Aomori	1292709	161	95	10.8566	188	112	12.874	257	156	17.9739	298	159	17.4918	379	203	22.4627	613	336	37.4139	561	290	31.6443	770	403	44.0984	1456	778	85.9574	167	119	14.5555	198	143	17.4255	277	204	25.0551	305	211	25.4761	393	275	33.4669	652	471	57.7407	556	384	46.5536
Iwate	1250142	155	92	10.5	180	108	12.3614	247	150	17.3053	286	152	16.7787	364	196	21.6827	590	324	36.1213	539	279	30.4691	740	388	42.5384	1400	750	82.9103	162	116	14.1098	191	138	16.8238	267	197	24.1638	295	204	24.6961	379	266	32.3749	630	456	55.9134	536	371	44.9937
Miyagi	2303098	285	158	17.4511	331	185	20.5278	451	256	28.5601	538	267	28.471	684	342	36.6077	1103	563	60.6108	1019	492	51.8572	1396	681	72.1912	2629	1309	139.887	283	191	22.7542	335	228	27.2688	465	324	39.0236	523	339	40.1165	669	442	52.5491	1103	752	90.3115	952	617	73.2913
Akita	1000223	125	78	9.11699	146	91	10.6664	200	127	14.9077	228	127	14.3095	291	164	18.5777	473	272	30.9542	429	233	25.9823	591	324	36.3074	1118	627	70.7262	134	100	12.3257	158	119	14.7218	223	171	21.1809	243	175	21.5022	314	229	28.2555	523	393	48.7114	442	318	39.1138
Yamagata	1095383	135	81	9.30713	157	95	10.8789	215	132	15.1929	249	134	14.7448	318	172	19.1304	515	284	31.6971	470	245	26.8471	645	341	37.4456	1219	657	72.8301	142	102	12.4549	167	122	14.8733	234	173	21.2492	258	180	21.7874	331	234	28.4575	553	402	49.2491	470	327	39.656
Fukushima	1901053	234	136	15.3936	274	161	18.225	374	222	25.2873	437	228	24.8369	555	292	31.9366	899	482	53.108	824	417	45.0301	1131	579	62.8503	2136	1117	122.158	241	169	20.4352	284	201	24.4477	398	288	35.1152	442	299	35.9583	566	390	47.042	940	668	81.2584	804	544	65.5556
Ibaraki	2936184	363	203	22.6566	423	239	26.681	575	330	37.0486	682	343	36.7073	867	439	47.2403	1401	724	78.4992	1291	631	66.9083	1770	875	93.2547	3334	1681	180.817	363	248	29.6754	430	296	35.4942	598	421	50.7995	670	440	52.2863	859	573	68.3971	1418	978	117.79	1220	800	95.318
Tochigi	1976121	245	137	15.1604	284	159	17.7467	387	221	24.7644	459	229	24.531	585	295	31.6813	943	485	52.3685	869	422	44.6798	1192	586	62.2833	2246	1127	120.852	244	166	19.8173	288	197	23.6128	402	282	33.9297	450	293	34.7669	576	382	45.5446	950	652	78.3914	819	535	63.629
Gunma	1981202	245	138	15.3832	285	162	18.1032	388	224	25.121	458	231	24.8429	584	298	32.1046	943	490	53.2597	868	426	45.326	1189	591	63.1077	2243	1137	122.567	246	168	20.1961	290	200	24.103	405	286	34.5536	453	298	35.5022	581	389	46.5473	959	664	80.0403	824	543	64.8546
Saitama	7377288	912	489	53.3356	1062	573	62.7838	1443	792	87.2048	1744	838	87.783	2215	1073	112.912	3569	1763	187.018	3313	1549	160.59	4535	2143	223.381	8526	4110	432.353	890	583	68.8719	1050	695	82.3768	1456	988	117.71	1653	1039	121.678	2111	1351	159.022	3466	2298	273.137	3010	1892	222.14
Chiba	6311190	781	423	46.49	910	497	54.723	1236	686	75.8995	1491	724	76.2913	1891	926	98.0261	3050	1523	162.395	2827	1335	139.212	3872	1849	193.795	7281	3547	375.163	768	508	60.2051	905	605	72.0374	1255	860	102.799	1422	903	106.207	1818	1175	138.909	2988	2000	238.643	2591	1646	194.015
Tokyo	13740732	1719	866	92.1018	1996	1014	108.1	2702	1395	149.619	3370	1523	154.753	4269	1947	198.614	6853	3183	327.455	6435	2835	284.642	8793	3913	395.103	16469	7470	761.396	1612	998	115.738	1894	1188	138.211	2604	1678	196.599	3032	1794	205.621	3854	2325	268.144	6266	3929	458.346	5534	3272	375.74
Kanagawa	9189521	1138	598	64.6679	1324	701	76.0785	1796	967	105.484	2192	1033	107.183	2780	1321	137.624	4475	2167	227.614	4168	1912	196.205	5703	2644	272.812	10708	5063	527.192	1097	705	82.7723	1292	841	98.9973	1788	1192	141.232	2044	1261	146.6	2607	1638	191.485	4267	2779	328.284	3724	2296	267.674
Niigata	2259309	280	165	18.7094	326	193	22.0088	446	268	30.5982	520	274	29.9801	661	351	38.5788	1069	578	64.0407	979	501	54.3406	1344	695	75.7605	2540	1341	147.36	289	204	24.7983	341	244	29.6635	477	348	42.5711	528	361	43.4916	679	471	57.0383	1127	807	98.5043	962	658	79.4681
Toyama	1063293	132	77	8.68321	153	89	10.1212	210	125	14.1901	245	127	13.8922	312	164	17.8825	504	270	29.6857	462	234	25.2368	635	325	35.2336	1198	625	68.384	134	94	11.4016	160	113	13.7146	223	161	19.667	248	168	20.1161	318	219	26.3852	527	374	45.455	450	304	36.6641
Ishikawa	1145948	141	79	8.85106	164	93	10.4451	224	129	14.4531	264	133	14.2829	337	172	18.5184	543	282	30.6009	499	245	26.0124	684	340	36.2767	1292	655	70.5874	142	97	11.6586	167	115	13.8379	234	165	19.8631	262	172	20.5068	334	223	26.6927	552	382	46.0418	474	312	37.2614
Fukui	786503	96	55	6.13097	113	65	7.25701	153	89	10.0885	180	92	9.8973	229	118	12.8507	370	195	21.3217	340	169	18.0938	466	234	25.1818	880	452	48.9325	98	68	8.18093	116	81	9.7749	161	115	13.9106	180	120	14.3046	230	156	18.6958	382	267	32.3271	327	218	26.0779
Yamanashi	832769	103	59	6.62123	120	69	7.74727	163	96	10.8684	192	98	10.6104	244	126	13.7421	395	208	22.7702	363	181	19.3863	498	251	27.0092	940	484	52.4981	105	73	8.7826	123	86	10.3766	173	123	14.9415	192	128	15.3519	246	167	20.0552	407	285	34.5555	349	233	27.9052
Nagano	2101891	259	150	16.9044	301	176	19.8918	412	244	27.7399	482	250	27.2391	612	321	35.0356	990	529	58.1576	907	458	49.3935	1245	636	68.8746	2350	1226	133.895	264	185	22.3635	314	222	26.8334	439	317	38.4932	485	328	39.3186	623	428	51.5729	1034	732	88.8718	883	597	71.8025
Gifu	2044114	251	142	15.8348	292	167	18.6885	399	231	26.0018	470	238	25.6347	598	306	33.0524	967	505	54.9711	888	439	46.7417	1218	608	65.1533	2296	1170	126.452	254	174	20.9151	300	208	24.9616	419	297	35.8192	466	309	36.7783	598	402	48.119	990	688	82.989	849	562	67.1452
Shizuoka	3726537	459	259	28.899	535	304	34.0271	729	421	47.3658	862	436	46.8274	1095	559	60.2916	1771	921	100.139	1630	802	85.314	2235	1112	118.955	4212	2139	230.707	463	317	37.996	547	378	45.5142	762	539	65.0947	852	562	66.9697	1091	732	87.5832	1805	1251	150.88	1550	1023	122.131
Aichi	7565309	928	487	52.5585	1079	571	61.7898	1467	788	85.7115	1778	839	86.9615	2255	1073	111.635	3632	1760	184.674	3376	1551	159.156	4620	2145	221.226	8679	4109	427.663	896	575	67.3149	1056	685	80.4528	1465	974	114.958	1664	1026	119.069	2125	1333	155.634	3484	2265	266.935	3029	1868	217.511
Mie	1824637	224	126	14.0566	262	149	16.6206	357	205	23.0144	422	213	22.8314	536	273	29.3963	867	450	48.8296	798	391	41.5539	1094	542	57.9034	2062	1044	112.376	227	155	18.5634	267	184	22.1748	372	262	31.639	417	274	32.6158	533	357	42.6299	881	609	73.3701	757	498	59.3831
Shiga	1420080	173	93	10.1673	201	109	11.8564	274	151	16.567	328	159	16.6467	415	202	21.2893	671	333	35.312	620	292	30.2987	849	404	42.1631	1600	776	81.7421	170	111	13.1085	200	132	15.6056	278	188	22.384	314	198	23.1274	401	257	30.1718	660	437	51.8636	570	359	42.1504
Kyoto	2555068	316	176	19.5577	368	206	22.9745	500	285	31.9264	597	297	31.7423	758	381	40.8819	1223	627	67.7715	1129	547	57.8087	1547	759	80.6	2913	1458	156.192	315	214	25.5516	372	254	30.4954	518	363	43.6882	582	379	44.9476	745	494	58.8405	1229	842	101.217	1060	690	82.0785
OsakaA31:G31	8848998	1094	590	64.6275	1273	692	76.0099	1731	956	105.565	2088	1009	106.14	2650	1293	136.463	4272	2124	225.989	3962	1864	193.907	5425	2580	269.833	10201	4950	522.327	1072	706	83.6012	1264	842	99.9984	1754	1196	142.8	1988	1257	147.534	2540	1636	192.986	4174	2783	331.5	3620	2290	269.465
Hyogo	5570618	685	379	41.9811	798	445	49.4281	1088	616	68.7209	1294	642	68.4169	1644	824	88.0509	2654	1356	146.061	2449	1183	124.757	3357	1640	173.773	6322	3151	336.829	683	460	54.8273	807	549	65.7177	1123	782	94.0047	1260	817	96.6782	1614	1065	126.599	2662	1815	217.745	2294	1488	176.513
Nara	1362781	168	97	10.8848	196	113	12.7967	268	157	17.8357	314	161	17.4815	399	207	22.5415	646	342	37.3991	592	296	31.7291	812	411	44.317	1534	792	86.1167	171	119	14.2776	202	142	17.1477	282	202	24.5604	314	210	25.1983	403	274	32.9722	668	469	56.8685	572	383	45.9534
Wakayama	964598	119	70	7.96418	139	82	9.37991	190	114	13.1086	222	117	12.8225	282	150	16.4504	456	247	27.423	416	213	23.1137	572	296	32.3024	1082	572	62.9509	123	87	10.6158	147	105	12.7727	204	149	18.1622	225	154	18.6335	290	202	24.4569	481	345	42.1556	410	281	33.9113
Tottori	566052	69	40	4.55921	82	48	5.50106	110	66	7.52437	129	68	7.47273	163	87	9.53475	265	143	15.8322	242	124	13.3961	332	172	18.6953	629	332	36.4827	72	51	6.18582	85	61	7.35049	120	87	10.6112	132	90	10.8328	169	117	14.1708	281	201	24.4136	239	163	19.7418
Shimane	686126	84	50	5.76846	98	60	6.84401	135	83	9.6086	154	83	9.23911	197	107	11.931	319	178	19.8998	291	153	16.8115	399	212	23.3869	755	410	45.5761	88	64	7.75159	105	76	9.32327	147	109	13.4084	161	113	13.691	208	147	17.904	346	252	30.9218	293	205	24.9071
Okayama	1911722	235	134	14.9375	274	156	17.5238	373	216	24.341	439	223	24.0688	557	286	30.9457	901	472	51.4323	827	410	43.7437	1135	569	61.0128	2142	1096	118.533	237	163	19.5498	280	195	23.4345	392	278	33.5954	436	289	34.4548	560	377	45.1879	926	645	77.8564	793	526	62.9381
Hiroshima	2838632	348	195	21.6538	406	229	25.5222	554	317	35.5615	654	329	35.1919	832	422	45.3461	1345	695	75.2292	1238	605	64.1671	1698	839	89.4053	3200	1613	173.341	351	238	28.5003	413	284	34.0012	577	405	48.7552	645	422	50.1529	825	549	65.5061	1364	938	112.893	1172	768	91.4628
Yamaguchi	1383079	170	102	11.7093	200	121	13.8886	272	167	19.2782	314	169	18.7234	400	217	24.1235	649	360	40.2676	591	310	33.935	812	431	47.4365	1536	831	92.3052	179	129	15.8093	213	155	18.9526	298	221	27.1452	326	227	27.5826	421	298	36.27	700	510	62.6116	593	414	50.3373
Tokushima	750519	93	55	6.3033	108	65	7.40114	148	90	10.344	173	92	10.0919	219	118	12.9784	355	194	21.5771	323	167	18.1933	444	232	25.3926	841	448	49.4821	96	69	8.37555	115	83	10.1032	159	117	14.3444	176	121	14.6938	227	159	19.3302	376	272	33.2616	322	222	26.8905
Kagawa	987336	122	70	7.90326	142	83	9.31899	194	114	12.9422	226	117	12.6888	288	150	16.3449	466	248	27.1675	427	215	23.1197	585	297	32.1138	1105	573	62.4117	124	86	10.3989	148	104	12.5558	205	148	17.9453	227	153	18.3275	293	200	24.0454	484	341	41.3935	414	278	33.4107
Ehime	1381761	170	100	11.3751	199	118	13.4207	272	164	18.7047	317	167	18.3282	402	214	23.6111	650	353	39.1758	595	305	33.1329	817	424	46.3224	1544	818	90.0161	177	125	15.1912	209	150	18.195	292	214	26.1202	322	221	26.6021	415	289	35.0222	689	494	60.3611	587	402	48.6274
Kochi	717480	90	54	6.23643	104	63	7.31198	143	88	10.2326	164	89	9.90765	208	114	12.7496	338	189	21.2146	307	162	17.8366	422	225	24.9186	799	436	48.5786	94	68	8.33097	111	82	10.0304	155	116	14.2716	171	120	14.5824	219	156	19.0568	366	269	33.0551	310	218	26.5279
Fukuoka	5131305	629	346	38.0917	732	405	44.7752	997	560	62.2066	1188	585	62.0762	1509	750	79.8546	2436	1235	132.499	2247	1078	113.19	3080	1494	157.654	5801	2871	305.677	624	417	49.5505	737	498	59.3045	1027	709	84.928	1151	741	87.4067	1475	965	114.447	2432	1646	196.834	2095	1349	159.569
Saga	828781	101	58	6.56027	118	68	7.68631	161	95	10.6797	187	97	10.499	238	124	13.4806	386	205	22.409	353	177	19.0356	484	246	26.5529	914	474	51.5352	103	72	8.61023	122	86	10.3379	170	122	14.7469	189	127	15.1573	243	165	19.8441	403	283	34.178	343	230	27.6273
Nagasaki	1365391	168	99	11.3141	196	117	13.3374	267	161	18.4655	309	164	18.0385	394	211	23.305	638	349	38.7641	581	300	32.6931	797	417	45.6374	1509	806	88.869	174	124	15.013	206	148	18.0003	289	212	25.9256	318	219	26.3852	409	286	34.6493	680	490	59.7935	578	398	48.1876
Kumamoto	1780079	218	126	14.2407	253	148	16.7542	347	206	23.46	403	211	22.9485	513	270	29.5357	830	446	49.1026	758	385	41.5536	1042	535	58.0649	1967	1031	112.804	224	157	18.9422	265	187	22.6709	371	268	32.603	409	277	33.3287	525	361	43.5493	874	620	75.2981	744	505	60.7645
Oita	1160218	142	84	9.55819	167	99	11.2918	228	138	15.7841	264	140	15.3971	336	180	19.8331	544	297	32.9792	496	256	27.8559	682	356	38.906	1289	686	75.6618	149	106	12.8173	176	126	15.3754	246	180	22.0409	271	186	22.49	348	243	29.4721	578	416	50.7435	492	338	40.8935
Miyazaki	1103755	135	80	9.05155	157	93	10.6233	215	130	14.8095	248	132	14.4834	316	169	18.6074	512	280	31.0404	467	241	26.1904	640	334	36.5215	1212	646	71.1439	140	99	12.0597	166	119	14.484	233	170	20.7321	255	175	21.1307	329	230	27.8067	547	393	47.9357	464	319	38.5982
Kagoshima	1643437	200	118	13.4266	235	140	15.9238	321	194	22.1333	369	196	21.555	470	252	27.7187	762	416	46.204	694	359	39.0457	954	498	54.4814	1803	962	106.016	209	148	17.9558	247	177	21.5225	346	253	30.8694	380	261	31.4896	489	341	41.3476	815	585	71.3911	691	475	57.5155
Okinawa	1476178	176	91	9.62796	205	106	11.323	279	147	15.6889	334	156	15.9514	425	200	20.539	684	327	33.911	633	287	29.1697	866	397	40.5334	1629	762	78.4827	170	106	12.2631	200	127	14.6325	278	180	20.916	312	189	21.6804	399	246	28.3578	657	418	48.7035	567	344	39.6293
Total	127443563	15737	8683	960.546	18326	10188	1130.23	24948	14092	1570.94	29798	14732	1566.63	37847	18881	2015.55	61078	31066	3341.73	56427	27142	2856.06	77321	37606	3977.66	145585	72257	7710.36	15641	10507	1252.55	18461	12537	1498.43	25674	17840	2143.36	28889	18669	2207.64	36974	24308	2888.68	60932	41436	4968.49	52596	33990	4029.58
[truncated: 6 more columns]

## Sheet: ThreeAgeGroups
Anticipated peak caseload by prefecture and age (other settings are the same as the other sheet)	Working-age centerd model
	R1.4																		R1.7																		R2.0
	day1						day 3						day 7						day1						day 3						day 7						day1						day 3						day 7
Prefecture	Total	Admission	ICU	0-19	20-59	60-	Total	Admission	ICU	0-19	20-59	60-	Total	Admission	ICU	0-19	20-59	60-	Total	Admission	ICU	0-19	20-59	60-	Total	Admission	ICU	0-19	20-59	60-	Total	Admission	ICU	0-19	20-59	60-	Total	Admission	ICU	0-19	20-59	60-	Total	Admission	ICU	0-19	20-59	60-	Total
Hokkaido	661	383	43.3761	47	350	264	770	449	50.9896	57	401	312	1050	623	71.049	84	526	440	1236	641	69.834	44	806	386	1571	822	89.8512	60	1010	501	2541	1356	149.362	107	1586	848	2334	1176	126.752	63	1591	680	3204	1633	176.897	90	2154	960	6044
Aomori	161	95	10.8566	12	82	67	188	112	12.874	14	94	80	257	156	17.9739	21	123	113	298	159	17.4918	11	188	99	379	203	22.4627	15	236	128	613	336	37.4139	26	370	217	561	290	31.6443	15	372	174	770	403	44.0984	22	503	245	1456
Iwate	155	92	10.5	12	78	65	180	108	12.3614	14	89	77	247	150	17.3053	21	117	109	286	152	16.7787	11	180	95	364	196	21.6827	15	225	124	590	324	36.1213	26	354	210	539	279	30.4691	16	355	168	740	388	42.5384	22	481	237	1400
Miyagi	285	158	17.4511	23	159	103	331	185	20.5278	27	182	122	451	256	28.5601	40	239	172	538	267	28.471	21	366	151	684	342	36.6077	29	459	196	1103	563	60.6108	52	720	331	1019	492	51.8572	30	723	266	1396	681	72.1912	43	978	375	2629
Akita	125	78	9.11699	8	59	58	146	91	10.6664	10	68	68	200	127	14.9077	15	89	96	228	127	14.3095	8	136	84	291	164	18.5777	10	171	110	473	272	30.9542	19	268	186	429	233	25.9823	11	269	149	591	324	36.3074	16	365	210	1118
Yamagata	135	81	9.30713	10	67	58	157	95	10.8789	12	77	68	215	132	15.1929	18	101	96	249	134	14.7448	10	155	84	318	172	19.1304	13	195	110	515	284	31.6971	24	306	185	470	245	26.8471	14	307	149	645	341	37.4456	20	415	210	1219
Fukushima	234	136	15.3936	18	122	94	274	161	18.225	22	140	112	374	222	25.2873	33	184	157	437	228	24.8369	17	282	138	555	292	31.9366	23	353	179	899	482	53.108	42	554	303	824	417	45.0301	25	556	243	1131	579	62.8503	35	753	343	2136
Ibaraki	363	203	22.6566	29	199	135	423	239	26.681	35	228	160	575	330	37.0486	51	299	225	682	343	36.7073	27	458	197	867	439	47.2403	37	574	256	1401	724	78.4992	66	901	434	1291	631	66.9083	39	904	348	1770	875	93.2547	55	1224	491	3334
Tochigi	245	137	15.1604	20	135	90	284	159	17.7467	24	154	106	387	221	24.7644	35	202	150	459	229	24.531	18	310	131	585	295	31.6813	25	389	171	943	485	52.3685	45	610	288	869	422	44.6798	26	612	231	1192	586	62.2833	37	829	326	2246
Gunma	245	138	15.3832	20	133	92	285	162	18.1032	24	152	109	388	224	25.121	35	200	153	458	231	24.8429	18	306	134	584	298	32.1046	25	384	175	943	490	53.2597	45	602	296	868	426	45.326	26	605	237	1189	591	63.1077	37	818	334	2243
Saitama	912	489	53.3356	73	532	307	1062	573	62.7838	88	610	364	1443	792	87.2048	129	801	513	1744	838	87.783	68	1227	449	2215	1073	112.912	93	1538	584	3569	1763	187.018	166	2414	989	3313	1549	160.59	98	2422	793	4535	2143	223.381	138	3279	1118	8526
Chiba	781	423	46.49	61	450	270	910	497	54.723	74	516	320	1236	686	75.8995	109	677	450	1491	724	76.2913	58	1038	395	1891	926	98.0261	78	1300	513	3050	1523	162.395	140	2042	868	2827	1335	139.212	82	2049	696	3872	1849	193.795	117	2773	982	7281
Tokyo	1719	866	92.1018	124	1094	501	1996	1014	108.1	150	1253	593	2702	1395	149.619	222	1645	835	3370	1523	154.753	117	2521	732	4269	1947	198.614	159	3158	952	6853	3183	327.455	285	4958	1610	6435	2835	284.642	167	4976	1292	8793	3913	395.103	237	6734	1822	16469
Kanagawa	1138	598	64.6679	90	682	366	1324	701	76.0785	109	781	434	1796	967	105.484	160	1025	611	2192	1033	107.183	85	1571	536	2780	1321	137.624	115	1969	696	4475	2167	227.614	206	3091	1178	4168	1912	196.205	121	3102	945	5703	2644	272.812	172	4198	1333	10708
Niigata	280	165	18.7094	21	144	115	326	193	22.0088	25	165	136	446	268	30.5982	38	217	191	520	274	29.9801	20	332	168	661	351	38.5788	27	416	218	1069	578	64.0407	48	653	368	979	501	54.3406	28	655	296	1344	695	75.7605	40	887	417	2540
Toyama	132	77	8.68321	10	69	53	153	89	10.1212	12	79	62	210	125	14.1901	18	104	88	245	127	13.8922	9	159	77	312	164	17.8825	13	199	100	504	270	29.6857	23	312	169	462	234	25.2368	13	313	136	635	325	35.2336	19	424	192	1198
Ishikawa	141	79	8.85106	12	76	53	164	93	10.4451	14	87	63	224	129	14.4531	21	115	88	264	133	14.2829	11	176	77	337	172	18.5184	15	221	101	543	282	30.6009	27	346	170	499	245	26.0124	16	347	136	684	340	36.2767	22	470	192	1292
Fukui	96	55	6.13097	8	51	37	113	65	7.25701	10	59	44	153	89	10.0885	14	77	62	180	92	9.8973	8	118	54	229	118	12.8507	10	148	71	370	195	21.3217	18	232	120	340	169	18.0938	11	233	96	466	234	25.1818	15	316	135	880
Yamanashi	103	59	6.62123	8	55	40	120	69	7.74727	10	63	47	163	96	10.8684	14	82	67	192	98	10.6104	8	126	58	244	126	13.7421	10	158	76	395	208	22.7702	18	249	128	363	181	19.3863	11	249	103	498	251	27.0092	15	338	145	940
Nagano	259	150	16.9044	21	135	103	301	176	19.8918	25	154	122	412	244	27.7399	37	203	172	482	250	27.2391	20	311	151	612	321	35.0356	27	389	196	990	529	58.1576	48	611	331	907	458	49.3935	28	613	266	1245	636	68.8746	40	830	375	2350
Gifu	251	142	15.8348	21	135	95	292	167	18.6885	25	154	113	399	231	26.0018	37	203	159	470	238	25.6347	20	311	139	598	306	33.0524	27	390	181	967	505	54.9711	48	612	307	888	439	46.7417	28	614	246	1218	608	65.1533	40	831	347	2296
Shizuoka	459	259	28.899	37	249	173	535	304	34.0271	45	285	205	729	421	47.3658	66	374	289	862	436	46.8274	35	574	253	1095	559	60.2916	47	719	329	1771	921	100.139	85	1129	557	1630	802	85.314	50	1133	447	2235	1112	118.955	71	1533	631	4212
Aichi	928	487	52.5585	81	549	298	1079	571	61.7898	97	629	353	1467	788	85.7115	144	826	497	1778	839	86.9615	76	1266	436	2255	1073	111.635	103	1586	566	3632	1760	184.674	184	2490	958	3376	1551	159.156	108	2499	769	4620	2145	221.226	154	3382	1084	8679
Mie	224	126	14.0566	18	122	84	262	149	16.6206	22	140	100	357	205	23.0144	33	184	140	422	213	22.8314	17	282	123	536	273	29.3963	23	353	160	867	450	48.8296	42	554	271	798	391	41.5539	25	556	217	1094	542	57.9034	35	753	306	2062
Shiga	173	93	10.1673	16	98	59	201	109	11.8564	19	113	69	274	151	16.567	28	148	98	328	159	16.6467	15	227	86	415	202	21.2893	20	284	111	671	333	35.312	36	447	188	620	292	30.2987	21	448	151	849	404	42.1631	30	606	213	1600
Kyoto	316	176	19.5577	25	175	116	368	206	22.9745	30	201	137	500	285	31.9264	44	263	193	597	297	31.7423	24	404	169	758	381	40.8819	32	506	220	1223	627	67.7715	57	794	372	1129	547	57.8087	34	797	298	1547	759	80.6	48	1078	421	2913
Osaka	1094	590	64.6275	87	633	374	1273	692	76.0099	105	725	443	1731	956	105.565	155	952	624	2088	1009	106.14	82	1459	547	2650	1293	136.463	111	1828	711	4272	2124	225.989	199	2870	1203	3962	1864	193.907	117	2880	965	5425	2580	269.833	166	3898	1361	10201
Hyogo	685	379	41.9811	56	381	248	798	445	49.4281	68	436	294	1088	616	68.7209	101	573	414	1294	642	68.4169	53	878	363	1644	824	88.0509	72	1100	472	2654	1356	146.061	129	1726	799	2449	1183	124.757	76	1732	641	3357	1640	173.773	108	2345	904	6322
Nara	168	97	10.8848	13	89	66	196	113	12.7967	16	102	78	268	157	17.8357	24	134	110	314	161	17.4815	13	205	96	399	207	22.5415	17	257	125	646	342	37.3991	31	404	211	592	296	31.7291	18	405	169	812	411	44.317	25	548	239	1534
Wakayama	119	70	7.96418	9	61	49	139	82	9.37991	11	70	58	190	114	13.1086	16	92	82	222	117	12.8225	9	141	72	282	150	16.4504	12	177	93	456	247	27.423	21	277	158	416	213	23.1137	12	278	126	572	296	32.3024	17	377	178	1082
Tottori	69	40	4.55921	6	35	28	82	48	5.50106	7	41	34	110	66	7.52437	10	53	47	129	68	7.47273	5	82	42	163	87	9.53475	7	102	54	265	143	15.8322	13	161	91	242	124	13.3961	8	161	73	332	172	18.6953	11	218	103	629
Shimane	84	50	5.76846	7	41	36	98	60	6.84401	8	47	43	135	83	9.6086	12	62	61	154	83	9.23911	6	95	53	197	107	11.931	9	119	69	319	178	19.8998	15	187	117	291	153	16.8115	9	188	94	399	212	23.3869	13	254	132	755
Okayama	235	134	14.9375	20	125	90	274	156	17.5238	24	144	106	373	216	24.341	35	189	149	439	223	24.0688	19	289	131	557	286	30.9457	25	362	170	901	472	51.4323	45	568	288	827	410	43.7437	26	570	231	1135	569	61.0128	37	772	326	2142
Hiroshima	348	195	21.6538	29	190	129	406	229	25.5222	35	218	153	554	317	35.5615	52	286	216	654	329	35.1919	27	438	189	832	422	45.3461	37	549	246	1345	695	75.2292	67	862	416	1238	605	64.1671	39	865	334	1698	839	89.4053	56	1171	471	3200
Yamaguchi	170	102	11.7093	13	84	73	200	121	13.8886	16	97	87	272	167	19.2782	23	127	122	314	169	18.7234	12	195	107	400	217	24.1235	17	244	139	649	360	40.2676	30	383	236	591	310	33.935	18	384	189	812	431	47.4365	25	520	267	1536
Tokushima	93	55	6.3033	7	47	39	108	65	7.40114	8	54	46	148	90	10.344	12	71	65	173	92	10.0919	7	109	57	219	118	12.9784	9	136	74	355	194	21.5771	16	214	125	323	167	18.1933	9	214	100	444	232	25.3926	13	290	141	841
Kagawa	122	70	7.90326	10	64	48	142	83	9.31899	12	73	57	194	114	12.9422	18	96	80	226	117	12.6888	9	147	70	288	150	16.3449	13	184	91	466	248	27.1675	23	289	154	427	215	23.1197	13	290	124	585	297	32.1138	19	392	174	1105
Ehime	170	100	11.3751	13	87	70	199	118	13.4207	16	100	83	272	164	18.7047	24	131	117	317	167	18.3282	13	201	103	402	214	23.6111	17	251	134	650	353	39.1758	30	394	226	595	305	33.1329	18	396	181	817	424	46.3224	25	536	256	1544
Kochi	90	54	6.23643	7	44	39	104	63	7.31198	8	50	46	143	88	10.2326	12	66	65	164	89	9.90765	6	101	57	208	114	12.7496	8	126	74	338	189	21.2146	15	198	125	307	162	17.8366	9	198	100	422	225	24.9186	12	269	141	799
Fukuoka	629	346	38.0917	54	351	224	732	405	44.7752	65	402	265	997	560	62.2066	96	528	373	1188	585	62.0762	51	810	327	1509	750	79.8546	69	1015	425	2436	1235	132.499	123	1593	720	2247	1078	113.19	72	1598	577	3080	1494	157.654	103	2163	814	5801
Saga	101	58	6.56027	9	52	40	118	68	7.68631	11	60	47	161	95	10.6797	16	79	66	187	97	10.499	8	121	58	238	124	13.4806	11	152	75	386	205	22.409	21	238	127	353	177	19.0356	12	239	102	484	246	26.5529	17	323	144	914
Nagasaki	168	99	11.3141	14	84	70	196	117	13.3374	17	96	83	267	161	18.4655	25	126	116	309	164	18.0385	13	194	102	394	211	23.305	18	243	133	638	349	38.7641	32	381	225	581	300	32.6931	19	382	180	797	417	45.6374	26	517	254	1509
Kumamoto	218	126	14.2407	19	112	87	253	148	16.7542	22	128	103	347	206	23.46	33	168	146	403	211	22.9485	18	257	128	513	270	29.5357	24	323	166	830	446	49.1026	43	506	281	758	385	41.5536	25	508	225	1042	535	58.0649	36	688	318	1967
Oita	142	84	9.55819	11	72	59	167	99	11.2918	14	83	70	228	138	15.7841	20	109	99	264	140	15.3971	11	166	87	336	180	19.8331	15	208	113	544	297	32.9792	26	327	191	496	256	27.8559	15	328	153	682	356	38.906	22	444	216	1289
Miyazaki	135	80	9.05155	12	67	56	157	93	10.6233	14	77	66	215	130	14.8095	21	101	93	248	132	14.4834	11	155	82	316	169	18.6074	15	195	106	512	280	31.0404	26	306	180	467	241	26.1904	16	307	144	640	334	36.5215	22	415	203	1212
Kagoshima	200	118	13.4266	17	100	83	235	140	15.9238	21	115	99	321	194	22.1333	31	151	139	369	196	21.555	16	231	122	470	252	27.7187	22	290	158	762	416	46.204	39	455	268	694	359	39.0457	23	456	215	954	498	54.4814	33	618	303	1803
Okinawa	176	91	9.62796	19	103	54	205	106	11.323	23	118	64	279	147	15.6889	34	155	90	334	156	15.9514	18	237	79	425	200	20.539	25	297	103	684	327	33.911	44	466	174	633	287	29.1697	26	468	139	866	397	40.5334	37	633	196	1629
Total	15737	8683	960.546	1257	8822	5658	18326	10188	1130.23	1515	10110	6701	24948	14092	1570.94	2237	13273	9438	29798	14732	1566.63	1183	20341	8274	37847	18881	2015.55	1604	25488	10755	61078	31066	3341.73	2871	40010	18197	56427	27142	2856.06	1686	40147	14594	77321	37606	3977.66	2393	54343	20585	145585
[truncated: 59 more columns]
